# Supplementary material
Source: PubMed Central journal article supplement (PMC3314296)
Supplement: NIHMS47246-supplement-tables.pdf [file NIHMS47246-supplement-tables.pdf]

**Table S1. Data Collection and Refinement Statistics, Related to Figures 1 and 2**

|                                                     | C5b6 <sup>a</sup>                                          | C5b6 <sup>b</sup>                                     |
|-----------------------------------------------------|------------------------------------------------------------|-------------------------------------------------------|
| <b>Data collection</b>                              |                                                            |                                                       |
| Space group                                         | <i>I</i> 2 <sub>1</sub> 2 <sub>1</sub> 2 <sub>1</sub>      | <i>I</i> 2 <sub>1</sub> 2 <sub>1</sub> 2 <sub>1</sub> |
| Cell dimensions                                     |                                                            |                                                       |
| <i>a</i> , <i>b</i> , <i>c</i> (Å)                  | 154.2, 230.8, 270.0                                        | 154.2, 230.8, 270.0                                   |
| $\alpha$ , $\beta$ , $\gamma$ (°)                   | 90.0, 90.0, 90.0                                           | 90.0, 90.0, 90.0                                      |
| Resolution (Å)                                      | 50.0-3.5 (3.83-3.50) <sup>c</sup>                          | 50.0-3.8 (4.25-3.80)                                  |
| <i>R</i> <sub>merge</sub>                           | 0.159 (1.043)                                              | 0.126 (0.464)                                         |
| <i>R</i> <sub>pim</sub>                             | 0.143 (0.946)                                              | 0.113 (0.418)                                         |
| <i>I</i> / $\sigma$ <i>I</i>                        | 4.8 (1.1)                                                  | 5.9 (2.3)                                             |
| Mn ( <i>I</i> ) CC <sup>d</sup>                     | 0.986 (0.302)                                              | 0.989 (0.709)                                         |
| Completeness (%)                                    | 98.0 (97.2)                                                | 98.3 (97.6)                                           |
| Redundancy                                          | 3.0 (3.0)                                                  | 3.0 (3.0)                                             |
| <b>Refinement</b>                                   |                                                            |                                                       |
| Resolution (Å) <sup>d</sup>                         | 50.0-3.5 ( <i>a</i> *=4.2, <i>b</i> *=3.8, <i>c</i> *=3.5) |                                                       |
| No. reflections                                     | 59017                                                      |                                                       |
| <i>R</i> <sub>work</sub> / <i>R</i> <sub>free</sub> | 25.6/27.0                                                  |                                                       |
| No. atoms                                           | 19028                                                      |                                                       |
| Protein                                             | 18928                                                      |                                                       |
| Glycans                                             | 99                                                         |                                                       |
| Ions                                                | 1                                                          |                                                       |
| <i>B</i> -factors (Å <sup>2</sup> )                 |                                                            |                                                       |
| Protein                                             | 157                                                        |                                                       |
| R.m.s. deviations                                   |                                                            |                                                       |
| Bond lengths (Å)                                    | 0.007                                                      |                                                       |
| Bond angles (°)                                     | 1.04                                                       |                                                       |

<sup>a</sup>Data statistics for all data between 50 and 3.5Å.

<sup>b</sup>Data statistics for data between 50 and 3.8Å, based on an overall half-dataset correlation coefficient > 0.5

<sup>c</sup>Values in parentheses are for highest-resolution shell.

<sup>d</sup>The data included is based upon a half-dataset correlation coefficient > 0.5

**Table S2. Rigid Body Changes in the C5 to C5b Transition, Related to Figure 1D**

|       | C5->C5b         |              | C3->C3b         |              |
|-------|-----------------|--------------|-----------------|--------------|
|       | Translation (Å) | Rotation (°) | Translation (Å) | Rotation (°) |
| MG3   | 3               | 44           | 4               | 15           |
| MG7   | 11              | 38           | 8               | 36           |
| MG8   | 19              | 57           | 23              | 61           |
| CUB   | 38              | 36           | 40              | 37           |
| TED   | 45              | 132          | 66              | 104          |
| C345C | 32              | 141          | 5               | 8            |

The structure of C5b was compared to that of C5 (Fredslund et al., 2008) (PDB code: 3CU7). First, the structures were superimposed on the  $\beta$ -chain. After that, all domains of C5 were individually superimposed on the corresponding domains of the C5b model. Those showing major rearrangements are depicted in the table. As a comparison, the same procedure was also performed for the C3 to C3b transition using for C3 (Janssen et al., 2005) (PDB code: 2A73), and for C3b (Janssen et al., 2006) (PDB code: 2I07). All calculations were done using the program Superpose from the CCP4 suite (1994).

**Table S3. Rigid Body Changes in C6 upon Binding to C5b, Related to Figure 1F**

|        | C6->(C5b)C6     |              |
|--------|-----------------|--------------|
|        | Translation (Å) | Rotation (°) |
| CCP1   | 28              | 95           |
| CCP2   | 83              | 71           |
| FIMACs | 153             | 108          |

The structure of C5b bound C6 was compared to that of free C6 (Aleshin et al., 2012) (PDB code: 3T5O). First, the structures were superimposed on the MACPF core. After that, the other domains of C6 were individually superimposed on the corresponding domains of the C5bC6 model. Those showing major rearrangements are depicted in the table. All calculations were done using the program Superpose from the CCP4 suite (1994).
